# Supplementary material for: On the chemical bonding features in boron containing compounds: a combined QTAIM/ELF topological analysis
Source: Royal Society of Chemistry journal article supplement (doi:10.1039/c3cp50396h), 2013-01-01
Supplement: c3cp50396h.pdf [file c3cp50396h.pdf]

## Supporting Information

### **On the chemical bonding feature in the boron containing compounds: a combined QTAIM / ELF topological analysis**

M. Esmail Alikhani<sup>1,2</sup>

1 - UPMC Univ. Paris 06, UMR 7075, Laboratoire de Dynamique, Interactions et Réactivité (LADIR), F-75005, Paris, France

2 - CNRS, UMR 7075, Laboratoire de Dynamique, Interactions et Réactivité (LADIR), F-75005, Paris, France

E-mail: [esmail.alikhani@upmc.fr](mailto:esmail.alikhani@upmc.fr)

**Complete reference (18):** M. J. Frisch, G. W. Trucks, H. B. Schlegel, G. E. Scuseria, M. A. Robb, J. R. Cheeseman, G. Scalmani, V. Barone, B. Mennucci, G. A. Petersson, H. Nakatsuji, M. Caricato, X. Li, H. P. Hratchian, A. F. Izmaylov, J. Bloino, G. Zheng, J. L. Sonnenberg, M. Hada, M. Ehara, K. Toyota, R. Fukuda, J. Hasegawa, M. Ishida, T. Nakajima, Y. Honda, O. Kitao, H. Nakai, T. Vreven, J. A. Montgomery, Jr., J. E. Peralta, F. Ogliaro, M. Bearpark, J. J. Heyd, E. Brothers, K. N. Kudin, V. N. Staroverov, R. Kobayashi, J. Normand, K. Raghavachari, A. Rendell, J. C. Burant, S. S. Iyengar, J. Tomasi, M. Cossi, N. Rega, J. M. Millam, M. Klene, J. E. Knox, J. B. Cross, V. Bakken, C. Adamo, J. Jaramillo, R. Gomperts, R. E. Stratmann, O. Yazyev, A. J. Austin, R. Cammi, C. Pomelli, J. W. Ochterski, R. L. Martin, K. Morokuma, V. G. Zakrzewski, G. A. Voth, P. Salvador, J. J. Dannenberg, S. Dapprich, A. D. Daniels, O. Farkas, J. B. Foresman, J. V. Ortiz, J. Cioslowski, and D. J. Fox, *Gaussian 09*, Revision A.02, Gaussian, Inc., Wallingford CT, 2009.

**Table S1: Cartesian Coordinates (in Å) for [(NHC)<sub>2</sub>(B<sub>2</sub>H<sub>n</sub>), n=0,2 or 4] (§ III-1) optimized with B3LYP/TZVP**

**[(NHC)<sub>2</sub>(B<sub>2</sub>H<sub>4</sub>); E = -662.0057679 a.u.**

|   |                 |                 |                 |
|---|-----------------|-----------------|-----------------|
| N | -2.622324323531 | -0.775032635465 | -1.077225380768 |
| C | -1.790153576941 | -0.860551296065 | 0.000000000000  |
| N | -2.622324323531 | -0.775032635465 | 1.077225380768  |
| C | -3.939714408312 | -0.623721234155 | 0.675586882215  |
| C | -3.939714408312 | -0.623721234155 | -0.675586882215 |
| B | -0.224145798013 | -0.897075861172 | 0.000000000000  |
| B | 0.224014919806  | 0.897089824309  | 0.000000000000  |
| C | 1.790031205984  | 0.860327361762  | 0.000000000000  |
| N | 2.622180272860  | 0.774808816969  | -1.077214248609 |
| C | 3.939613294754  | 0.623896100534  | -0.675590462969 |
| C | 3.939613294754  | 0.623896100534  | 0.675590462969  |
| N | 2.622180272860  | 0.774808816969  | 1.077214248609  |
| C | 2.161768606810  | 0.787577983538  | -2.455129366264 |
| C | 2.161768606810  | 0.787577983538  | 2.455129366264  |
| C | -2.161942670634 | -0.786794753176 | 2.455158871835  |
| C | -2.161942670634 | -0.786794753176 | -2.455158871835 |
| H | -0.185428900571 | 1.449145212796  | 1.005422056633  |
| H | 0.185435494373  | -1.449027463976 | 1.005447349135  |
| H | 0.185435494373  | -1.449027463976 | -1.005447349135 |
| H | -0.185428900571 | 1.449145212796  | -1.005422056633 |
| H | -4.748877416880 | -0.534317476194 | -1.377944512658 |
| H | -4.748877416880 | -0.534317476194 | 1.377944512658  |
| H | 4.748760826316  | 0.534384074212  | -1.377949047048 |
| H | 4.748760826316  | 0.534384074212  | 1.377949047048  |
| H | 1.478002281915  | -0.044305550576 | -2.621135334386 |
| H | 1.639483175333  | 1.719533654634  | -2.668730071834 |
| H | 3.024485228490  | 0.692037595228  | -3.112456879356 |
| H | 3.024485228490  | 0.692037595228  | 3.112456879356  |
| H | 1.639483175332  | 1.719533654634  | 2.668730071834  |
| H | 1.478002281915  | -0.044305550576 | 2.621135334386  |
| H | -3.025336773070 | -0.698241417455 | 3.112634274606  |
| H | -1.633384236170 | -1.715580153092 | 2.666984274666  |
| H | -1.483677827101 | 0.049354231762  | 2.622756643197  |
| H | -3.025336773070 | -0.698241417455 | -3.112634274606 |
| H | -1.483677827101 | 0.049354231762  | -2.622756643197 |
| H | -1.633384236170 | -1.715580153092 | -2.666984274666 |

**[(NHC)<sub>2</sub>(B<sub>2</sub>H<sub>2</sub>); E = -660.7776267 a.u.**

|   |                 |                 |                |
|---|-----------------|-----------------|----------------|
| B | -0.639831550146 | -0.486942961717 | 0.000000000000 |
| B | 0.639429153161  | 0.487652828300  | 0.000000000000 |
| H | -0.575340540967 | -1.687897033953 | 0.000000000000 |
| H | 0.574833496172  | 1.688599243308  | 0.000000000000 |
| C | -2.123587370767 | -0.058370759335 | 0.000000000000 |
| N | -2.707684515444 | 1.190669210134  | 0.000000000000 |
| C | -4.084630307814 | 1.094635088219  | 0.000000000000 |
| C | -4.396099187193 | -0.221133105202 | 0.000000000000 |

|   |                 |                 |                 |
|---|-----------------|-----------------|-----------------|
| N | -3.206581292453 | -0.919772441678 | 0.000000000000  |
| C | 2.123204794985  | 0.059172153998  | 0.000000000000  |
| N | 3.206181672236  | 0.920590986171  | 0.000000000000  |
| C | 4.395709852771  | 0.221962189389  | 0.000000000000  |
| C | 4.084256052502  | -1.093813442144 | 0.000000000000  |
| N | 2.707312408993  | -1.189856870285 | 0.000000000000  |
| C | 1.980669071848  | -2.441683602401 | 0.000000000000  |
| C | 3.112366956834  | 2.367918950709  | 0.000000000000  |
| C | -1.981062395807 | 2.442509769452  | 0.000000000000  |
| C | -3.112807962725 | -2.367105051649 | 0.000000000000  |
| H | -4.718846523710 | 1.962923797893  | 0.000000000000  |
| H | -5.352566160386 | -0.712554538181 | 0.000000000000  |
| H | 4.718475229536  | -1.962100573353 | 0.000000000000  |
| H | 5.352165929132  | 0.713399104638  | 0.000000000000  |
| H | 2.699091270540  | -3.260175759037 | 0.000000000000  |
| H | 1.339017409066  | -2.504402928097 | 0.879348252895  |
| H | 1.339017409066  | -2.504402928097 | -0.879348252895 |
| H | 4.120949885207  | 2.778755253031  | 0.000000000000  |
| H | 2.577459689059  | 2.716947674028  | -0.883515678713 |
| H | 2.577459689059  | 2.716947674028  | 0.883515678713  |
| H | -2.577919396921 | -2.716157732583 | -0.883516724301 |
| H | -2.577919396921 | -2.716157732583 | 0.883516724301  |
| H | -4.121403615247 | -2.777910856867 | 0.000000000000  |
| H | -1.339416435172 | 2.505256565705  | -0.879349132592 |
| H | -2.699506883326 | 3.260982262452  | 0.000000000000  |
| H | -1.339416435172 | 2.505256565705  | 0.879349132592  |

**[(NHC)<sub>2</sub>(B<sub>2</sub>)]<sub>2</sub>; E = -659.5136785 a.u.**

|   |                 |                 |                 |
|---|-----------------|-----------------|-----------------|
| N | 3.166534082968  | -0.207666523633 | 0.693295919749  |
| C | 2.165892117979  | 0.446063301231  | -0.000080055482 |
| N | 2.826452021969  | 1.441973094438  | -0.693770449177 |
| C | 4.185393956984  | 1.392076493022  | -0.433616055334 |
| C | 4.394950286767  | 0.375596828245  | 0.433099074633  |
| B | 0.713821414616  | 0.147097284843  | 0.000196055799  |
| B | -0.713821414616 | -0.147097284843 | 0.000196055799  |
| C | -2.165892117979 | -0.446063301231 | -0.000080055482 |
| N | -3.166534082968 | 0.207666523633  | 0.693295919749  |
| C | -4.394950286767 | -0.375596828245 | 0.433099074633  |
| C | -4.185393956984 | -1.392076493022 | -0.433616055334 |
| N | -2.826452021969 | -1.441973094438 | -0.693770449177 |
| C | -2.910960798170 | 1.316023346875  | 1.586836340449  |
| C | -2.153147982766 | -2.359491219724 | -1.586532509597 |
| C | 2.153147982766  | 2.359491219724  | -1.586532509597 |
| C | 2.910960798170  | -1.316023346875 | 1.586836340449  |
| H | 5.304685659365  | 0.018898871830  | 0.882150962996  |
| H | 4.879919324064  | 2.079255486809  | -0.882969506063 |
| H | -5.304685659365 | -0.018898871830 | 0.882150962996  |
| H | -4.879919324064 | -2.079255486809 | -0.882969506063 |
| H | -3.855588938387 | 1.794044784008  | 1.843177703374  |
| H | -2.413455371912 | 0.975608921439  | 2.498675991481  |

|   |                 |                 |                 |
|---|-----------------|-----------------|-----------------|
| H | -2.253856603889 | 2.034098329828  | 1.092469419870  |
| H | -2.833074657062 | -3.170080244077 | -1.845768763445 |
| H | -1.827125438106 | -1.849638521978 | -2.496808285359 |
| H | -1.267913424028 | -2.762051712660 | -1.090355843893 |
| H | 1.827125438106  | 1.849638521978  | -2.496808285359 |
| H | 1.267913424028  | 2.762051712660  | -1.090355843893 |
| H | 2.833074657062  | 3.170080244077  | -1.845768763445 |
| H | 2.253856603889  | -2.034098329828 | 1.092469419870  |
| H | 3.855588938387  | -1.794044784008 | 1.843177703374  |
| H | 2.413455371912  | -0.975608921439 | 2.498675991481  |

**Table S2: Cartesian Coordinates (in Å) for ptB (§ III-2) optimized with B3LYP/Def2-SVP**

**E = -827.3234774 a.u.**

|    |           |           |           |
|----|-----------|-----------|-----------|
| B  | 0.533707  | 0.298187  | 0.479954  |
| B  | -0.519712 | -0.308386 | -0.531169 |
| B  | 1.192606  | -0.697448 | -0.895197 |
| B  | -1.178612 | 0.687250  | 0.843981  |
| H  | 0.874203  | -1.337182 | -1.865590 |
| H  | -0.860328 | 1.325525  | 1.815374  |
| C  | -2.688082 | 0.632165  | 0.469463  |
| C  | 2.702077  | -0.642364 | -0.520678 |
| H  | -3.287629 | 0.534605  | 1.396079  |
| H  | 3.301623  | -0.544803 | -1.447294 |
| C  | 3.017160  | 0.404938  | 0.579670  |
| C  | -3.003166 | -0.415136 | -0.630885 |
| H  | 3.732661  | 0.032691  | 1.344676  |
| H  | -3.718667 | -0.042890 | -1.395891 |
| C  | 1.707703  | 0.764161  | 1.194690  |
| C  | -1.693708 | -0.774360 | -1.245905 |
| H  | 1.680908  | 1.354785  | 2.115435  |
| H  | -1.666913 | -1.364984 | -2.166650 |
| Si | 3.922154  | 1.966247  | -0.113118 |
| Si | -3.230453 | 2.432444  | -0.015698 |
| Si | 3.214444  | -2.415903 | 0.081477  |
| Si | -3.908159 | -1.976446 | 0.061902  |
| H  | 6.199169  | 2.350079  | -1.089623 |
| H  | -5.463022 | 3.439725  | -0.506675 |
| H  | 6.248964  | 1.030930  | 0.103924  |
| H  | -5.632515 | 2.109719  | 0.664729  |
| H  | 5.609582  | 0.732409  | -1.530614 |
| H  | -5.423675 | 1.752852  | -1.067498 |
| H  | 4.628583  | 2.800202  | 2.151835  |
| H  | 4.682976  | 4.107082  | 0.945733  |
| H  | 3.120956  | 3.592248  | 1.627944  |
| H  | 3.457257  | 3.625361  | -1.921286 |

|   |           |           |           |
|---|-----------|-----------|-----------|
| H | 2.844583  | 2.022460  | -2.388745 |
| H | 1.934003  | 3.014752  | -1.224420 |
| H | -2.813393 | 3.946217  | -1.959107 |
| H | -1.725372 | 3.767439  | 1.499772  |
| H | -3.252935 | 4.624787  | 1.178576  |
| H | -3.212519 | 3.286896  | 2.350856  |
| H | -2.542996 | 2.246107  | -2.422815 |
| H | -1.309897 | 3.113756  | -1.483214 |
| C | -2.395650 | 2.984003  | -1.617986 |
| C | -2.812471 | 3.634545  | 1.383956  |
| C | -5.110126 | 2.425606  | -0.253302 |
| C | 2.946862  | 2.723200  | -1.544268 |
| C | 4.103340  | 3.231535  | 1.283150  |
| C | 5.651503  | 1.469826  | -0.712429 |
| C | 5.092951  | -2.429404 | 0.330162  |
| C | 2.786920  | -3.701284 | -1.240334 |
| C | 2.355151  | -2.854389 | 1.704642  |
| H | 5.419101  | -1.720623 | 1.107775  |
| H | 5.623491  | -2.174575 | -0.602109 |
| H | 5.424371  | -3.435614 | 0.638215  |
| H | 3.211994  | -3.428378 | -2.220590 |
| H | 3.194801  | -4.688175 | -0.963853 |
| H | 1.698359  | -3.811005 | -1.367590 |
| H | 2.752717  | -3.804778 | 2.099228  |
| H | 2.507497  | -2.078463 | 2.471297  |
| H | 1.268836  | -2.972578 | 1.565727  |
| C | -2.935897 | -2.732715 | 1.495564  |
| C | -4.086838 | -3.242641 | -1.333751 |
| C | -5.639220 | -1.481123 | 0.657197  |
| H | -2.833785 | -2.030681 | 2.338954  |
| H | -1.923016 | -3.026451 | 1.177725  |
| H | -3.448334 | -3.633460 | 1.873271  |
| H | -3.103902 | -3.600821 | -1.679627 |
| H | -4.663474 | -4.119643 | -0.994792 |
| H | -4.614662 | -2.813447 | -2.201932 |
| H | -6.190589 | -2.363290 | 1.024401  |
| H | -6.231725 | -1.034554 | -0.158601 |
| H | -5.600074 | -0.750411 | 1.481518  |

**Table S3: Cartesian Coordinates (in Å) for [RuH2( $\eta^2$ :  $\eta^2$ -H<sub>2</sub>BMes)PCy<sub>3</sub>)<sub>2</sub>] (§ III-3) optimized with B3LYP/LanL2DZ.**

**E = - 1895.0938011a.u.**

|   |           |          |           |
|---|-----------|----------|-----------|
| C | -0.819650 | 3.263304 | -0.201051 |
| C | -0.783237 | 4.119410 | 0.952159  |
| C | -1.205669 | 5.460677 | 0.859054  |
| H | -1.164234 | 6.091280 | 1.746180  |
| C | -1.677812 | 6.009842 | -0.348991 |

|   |           |           |           |
|---|-----------|-----------|-----------|
| C | -1.704006 | 5.178156  | -1.485928 |
| H | -2.054819 | 5.587060  | -2.432681 |
| C | -1.285793 | 3.834116  | -1.434276 |
| C | -0.278521 | 3.633440  | 2.303918  |
| H | -0.869151 | 2.788873  | 2.680450  |
| H | -0.327846 | 4.437300  | 3.047504  |
| H | 0.761273  | 3.287526  | 2.248148  |
| C | -1.345271 | 3.026496  | -2.722963 |
| H | -1.754592 | 3.630411  | -3.541133 |
| H | -1.971207 | 2.133344  | -2.615021 |
| H | -0.350012 | 2.676540  | -3.027602 |
| C | -2.161153 | 7.446994  | -0.420277 |
| H | -1.960516 | 7.888827  | -1.404040 |
| H | -1.677214 | 8.071786  | 0.340160  |
| H | -3.246698 | 7.506087  | -0.250953 |
| C | 3.458500  | -0.330382 | 1.585329  |
| H | 3.380146  | -1.381075 | 1.905994  |
| C | 2.698133  | 0.518392  | 2.636602  |
| H | 1.641174  | 0.229559  | 2.645540  |
| H | 2.735355  | 1.581899  | 2.352268  |
| C | 3.317165  | 0.347954  | 4.044272  |
| H | 2.779420  | 0.980773  | 4.765709  |
| H | 3.181365  | -0.695113 | 4.373146  |
| C | 4.824158  | 0.692342  | 4.051413  |
| H | 4.950760  | 1.767096  | 3.842744  |
| H | 5.253382  | 0.508080  | 5.046822  |
| C | 5.585338  | -0.124745 | 2.982517  |
| H | 5.560794  | -1.191717 | 3.256285  |
| H | 6.643875  | 0.173744  | 2.958651  |
| C | 4.961269  | 0.055048  | 1.575232  |
| H | 5.521611  | -0.544161 | 0.848107  |
| H | 5.074126  | 1.106830  | 1.275240  |
| C | 3.120715  | -2.013506 | -0.943227 |
| H | 2.540690  | -2.017285 | -1.878001 |
| C | 2.661248  | -3.239337 | -0.115313 |
| H | 3.219490  | -3.277568 | 0.834067  |
| H | 1.599914  | -3.136520 | 0.134786  |
| C | 2.909759  | -4.556959 | -0.889133 |
| H | 2.607123  | -5.413535 | -0.269101 |
| H | 2.271108  | -4.572226 | -1.786384 |
| C | 4.389756  | -4.702445 | -1.311812 |
| H | 5.013561  | -4.822758 | -0.411383 |
| H | 4.525719  | -5.610809 | -1.916693 |
| C | 4.870666  | -3.461455 | -2.098207 |
| H | 4.333601  | -3.408855 | -3.058612 |
| H | 5.940766  | -3.553623 | -2.336046 |
| C | 4.621443  | -2.153835 | -1.304126 |
| H | 5.224487  | -2.183501 | -0.385588 |
| H | 4.972438  | -1.298152 | -1.894836 |
| C | 3.472602  | 0.974886  | -1.196005 |

|   |           |           |           |
|---|-----------|-----------|-----------|
| H | 4.545898  | 0.741791  | -1.127933 |
| C | 3.041471  | 0.888066  | -2.682411 |
| H | 3.237699  | -0.114499 | -3.086073 |
| H | 1.955170  | 1.046554  | -2.746519 |
| C | 3.772160  | 1.941213  | -3.551160 |
| H | 4.848982  | 1.707955  | -3.576687 |
| H | 3.409198  | 1.878828  | -4.587574 |
| C | 3.576245  | 3.372207  | -3.001436 |
| H | 2.514775  | 3.653860  | -3.088416 |
| H | 4.147939  | 4.092355  | -3.604578 |
| C | 4.001600  | 3.457854  | -1.519003 |
| H | 3.805234  | 4.465443  | -1.125544 |
| H | 5.088191  | 3.289891  | -1.442241 |
| C | 3.255576  | 2.410696  | -0.657046 |
| H | 3.591925  | 2.488558  | 0.385285  |
| H | 2.181532  | 2.643694  | -0.661177 |
| C | -2.086425 | -3.033229 | 0.409991  |
| H | -1.217686 | -3.144593 | 1.075358  |
| C | -3.301572 | -3.707655 | 1.099309  |
| H | -3.535709 | -3.221702 | 2.053993  |
| H | -4.196122 | -3.620830 | 0.467096  |
| C | -3.013539 | -5.208522 | 1.364197  |
| H | -2.188370 | -5.291635 | 2.089450  |
| H | -3.893953 | -5.676801 | 1.829056  |
| C | -2.628606 | -5.961378 | 0.070921  |
| H | -3.497440 | -5.986348 | -0.606701 |
| H | -2.375477 | -7.006247 | 0.301977  |
| C | -1.447780 | -5.267216 | -0.644523 |
| H | -0.542729 | -5.349440 | -0.022047 |
| H | -1.227902 | -5.775408 | -1.594850 |
| C | -1.748789 | -3.772779 | -0.908684 |
| H | -2.602481 | -3.706204 | -1.599982 |
| H | -0.891484 | -3.293839 | -1.396474 |
| C | -3.108739 | -0.539679 | 1.761553  |
| H | -4.019502 | -1.156267 | 1.796770  |
| C | -2.280828 | -0.811817 | 3.043639  |
| H | -1.994583 | -1.870843 | 3.102682  |
| H | -1.343323 | -0.241586 | 2.987990  |
| C | -3.060683 | -0.411594 | 4.318661  |
| H | -2.433822 | -0.586887 | 5.205350  |
| H | -3.948722 | -1.056032 | 4.423321  |
| C | -3.508468 | 1.066467  | 4.264133  |
| H | -4.102897 | 1.318636  | 5.154268  |
| H | -2.617800 | 1.714970  | 4.281843  |
| C | -4.322080 | 1.351821  | 2.981815  |
| H | -4.584434 | 2.418385  | 2.926477  |
| H | -5.270348 | 0.791665  | 3.024912  |
| C | -3.547915 | 0.943462  | 1.703463  |
| H | -4.186964 | 1.126065  | 0.828905  |
| H | -2.663538 | 1.584521  | 1.589501  |

|    |           |           |           |
|----|-----------|-----------|-----------|
| C  | -3.355165 | -0.663648 | -1.232624 |
| H  | -3.483223 | 0.421446  | -1.090056 |
| C  | -4.757980 | -1.316750 | -1.154433 |
| H  | -4.668069 | -2.401746 | -1.308013 |
| H  | -5.207346 | -1.167968 | -0.163093 |
| C  | -5.697020 | -0.737647 | -2.242057 |
| H  | -5.866498 | 0.332385  | -2.041852 |
| H  | -6.678488 | -1.231419 | -2.188549 |
| C  | -5.093343 | -0.901366 | -3.655687 |
| H  | -5.031471 | -1.973935 | -3.900553 |
| H  | -5.753213 | -0.441058 | -4.405123 |
| C  | -3.679142 | -0.280312 | -3.733410 |
| H  | -3.757948 | 0.811625  | -3.608772 |
| H  | -3.242335 | -0.455224 | -4.727508 |
| C  | -2.742230 | -0.856059 | -2.643451 |
| H  | -1.756574 | -0.377629 | -2.688301 |
| H  | -2.582402 | -1.923930 | -2.843442 |
| P  | 2.551130  | -0.347049 | -0.131273 |
| P  | -2.124250 | -1.099627 | 0.195164  |
| Ru | 0.118141  | -0.213747 | -0.023578 |
| B  | -0.350164 | 1.784734  | -0.123734 |
| H  | 0.368098  | -1.338019 | 1.114102  |
| H  | 0.215670  | -1.452162 | -1.050364 |
| H  | -0.143005 | 1.183507  | -1.237096 |
| H  | 0.010746  | 1.348160  | 1.019514  |

**Table S4: Cartesian Coordinates (in Å) for [Cr(CO)<sub>5</sub>(η<sup>1</sup>-BH<sub>3</sub>.PH<sub>3</sub>)] (§ III-4) optimized with B3LYP/TZVP & SDD.**

**E = -1023.7651397 a.u.**

|    |                 |                 |                 |
|----|-----------------|-----------------|-----------------|
| C  | -0.007343884402 | 0.028667202342  | -0.001807142126 |
| O  | -0.011672915165 | 0.043741101498  | 1.144710344527  |
| Cr | 0.028917115516  | 0.002380621092  | -1.907207991767 |
| C  | 1.889057359043  | 0.015701353497  | -1.871319228524 |
| O  | 3.038380817788  | 0.024132263447  | -1.844166287280 |
| C  | -0.002880627968 | -1.910763324351 | -1.888258430770 |
| O  | -0.009329300354 | -3.055036536752 | -1.874006501314 |
| C  | 0.050789664398  | -0.024836036351 | -3.825969855045 |
| O  | 0.099982677620  | -0.040480458985 | -4.967845080214 |
| C  | -0.029064762742 | 1.914557711487  | -1.942559562523 |
| O  | -0.051379000392 | 3.058611394574  | -1.960791010547 |
| B  | -2.720102521849 | -0.023719325151 | -2.500537709289 |
| P  | -4.230512091987 | -0.002369884556 | -1.241392259585 |
| H  | -1.798614448546 | -0.007714188043 | -1.673910724370 |
| H  | -2.856865975473 | 0.980318003378  | -3.137241204386 |
| H  | -2.853050073318 | -1.051787647422 | -3.098625682057 |
| H  | -4.347812529535 | -1.073332385258 | -0.329204104626 |
| H  | -5.506397589523 | -0.017701138963 | -1.842628572875 |
| H  | -4.353406911450 | 1.103805278869  | -0.373020998356 |

**Table S5: Cartesian Coordinates (in Å) for [Cr(CO)<sub>4</sub>(η<sup>2</sup>-B<sub>2</sub>H<sub>4</sub>.2PMe<sub>3</sub>)] (§ III-4) optimized with B3LYP/LanL2DZ.**

**E = -844.1726467 a.u.**

|    |                 |                 |                 |
|----|-----------------|-----------------|-----------------|
| Cr | -1.533451488081 | -0.003253034062 | -0.003159371517 |
| C  | -2.792847865364 | 0.939653441748  | 0.941729761764  |
| C  | -2.789684712506 | -0.947897951398 | -0.950850566924 |
| C  | -1.603344543672 | -1.328197271416 | 1.326126105949  |
| C  | -1.601168021972 | 1.323185372559  | -1.330764600207 |
| H  | -0.355091890232 | -0.954335850295 | -1.084516873748 |
| H  | -0.360284815895 | 0.948187519274  | 1.082653579401  |
| B  | 0.764064840930  | -0.546401549944 | -0.671601377825 |
| B  | 0.761075756277  | 0.545530141963  | 0.670514186225  |
| H  | 1.333069642995  | -0.203248165933 | -1.687746922499 |
| H  | 1.329857390755  | 0.203969362971  | 1.687375059740  |
| P  | 1.693094586942  | -2.273497834672 | -0.251703078220 |
| P  | 1.682150986951  | 2.278095092734  | 0.254039705974  |
| C  | 1.237950873586  | -3.681282315303 | -1.409444358901 |
| C  | 3.550724231902  | -2.089210101462 | -0.459761337899 |
| C  | 1.508529066547  | -2.998714371610 | 1.469285483246  |
| C  | 1.197897338963  | 3.687237484028  | 1.398129713739  |
| C  | 3.538202940518  | 2.110723772590  | 0.488986702263  |
| C  | 1.515944871930  | 2.992826686577  | -1.473251871367 |
| H  | 1.823742785593  | -4.581603705286 | -1.193939185156 |
| H  | 0.172684781862  | -3.906616691822 | -1.297304601470 |
| H  | 1.416116968879  | -3.368871030041 | -2.443390907629 |
| H  | 4.061876868354  | -3.045009008745 | -0.301990773234 |
| H  | 3.765834493164  | -1.724683618736 | -1.469051439655 |
| H  | 3.923008977320  | -1.359490087726 | 0.266233121670  |
| H  | 2.209668505750  | -3.828884492361 | 1.608755211414  |
| H  | 1.709494115889  | -2.217718460884 | 2.207864115845  |
| H  | 0.487594442428  | -3.356762686524 | 1.622073238224  |
| H  | 2.211172138058  | 3.828922637631  | -1.606791628295 |
| H  | 1.735216879038  | 2.209881652507  | -2.204561450244 |
| H  | 0.493992121533  | 3.340197309678  | -1.642905462049 |
| H  | 4.043512453302  | 3.069939500559  | 0.333241299427  |
| H  | 3.742165465296  | 1.753116971625  | 1.503033669311  |
| H  | 3.926725724534  | 1.380401217862  | -0.227877566493 |
| H  | 1.779728141732  | 4.591342775576  | 1.187862256553  |
| H  | 0.132699938294  | 3.903339635611  | 1.268380465006  |
| H  | 1.362236570237  | 3.380600482526  | 2.436097761072  |
| O  | -1.716919904535 | 2.157226424172  | -2.167556293204 |
| O  | -1.720231739009 | -2.157407074912 | 2.167430934494  |
| O  | -3.584150989845 | -1.578961202405 | -1.572043298036 |
| O  | -3.587474394747 | 1.569072645896  | 1.564463830946  |
